# Supplementary material for: Photonic crystals with rainbow colors by centrifugation-assisted assembly of colloidal lignin nanoparticles
Source: PubMed Central journal article supplement (PMC10227086; doi:10.1038/s41467-023-38819-5), 2023-05-29
Supplement: 41467_2023_38819_MOESM1_ESM.pdf [file 41467_2023_38819_MOESM1_ESM.pdf]

## Supplementary Information

### **Photonic crystals with rainbow colors by centrifugation-assisted assembly of colloidal lignin nanoparticles**

*Jinrong Liu,<sup>1,2</sup> Mathias Nero,<sup>1</sup> Kjell Jansson,<sup>1</sup> Tom Willhammar,<sup>1</sup> Mika H. Sipponen<sup>1,2\*</sup>*

*<sup>1</sup>Department of Materials and Environmental Chemistry, Stockholm University, Sweden*

*<sup>2</sup>Wallenberg Wood Science Center, Department of Materials and Environmental Chemistry, Stockholm University, SE-10691 Stockholm, Sweden*

This PDF contains:

Supplementary Table 1

Supplementary Figures 1–8

Supplementary References

## Supplementary Tables

**Supplementary Table 1.** Calculation of the PDI of LNPs.

|                                                      | <b>Fig. 2e</b> | <b>Fig. 4d</b> | <b>Fig. S8d</b> | <b>Fig. S8c</b> | <b>Fig. S8b</b> | <b>Fig. S8a</b> | <b>Fig. 4c</b> |
|------------------------------------------------------|----------------|----------------|-----------------|-----------------|-----------------|-----------------|----------------|
| <b>Peak (nm)</b>                                     | /              | 240            | 200             | 180             | 170             | 160             | 150            |
| <b>Average size (D) (nm) *</b>                       | 77.4           | 226.8          | 193.0           | 190.7           | 175.5           | 156.0           | 154.2          |
| <b>Standard deviation (<math>\sigma</math>) (nm)</b> | 20.3           | 46.7           | 30.1            | 30.4            | 27.1            | 17.7            | 14.5           |
| <b>PDI=<math>(\sigma/D)^2</math></b>                 | 0.069          | 0.042          | 0.024           | 0.020           | 0.030           | 0.013           | 0.009          |

\* 100 particles were analysed.

## Supplementary Figures

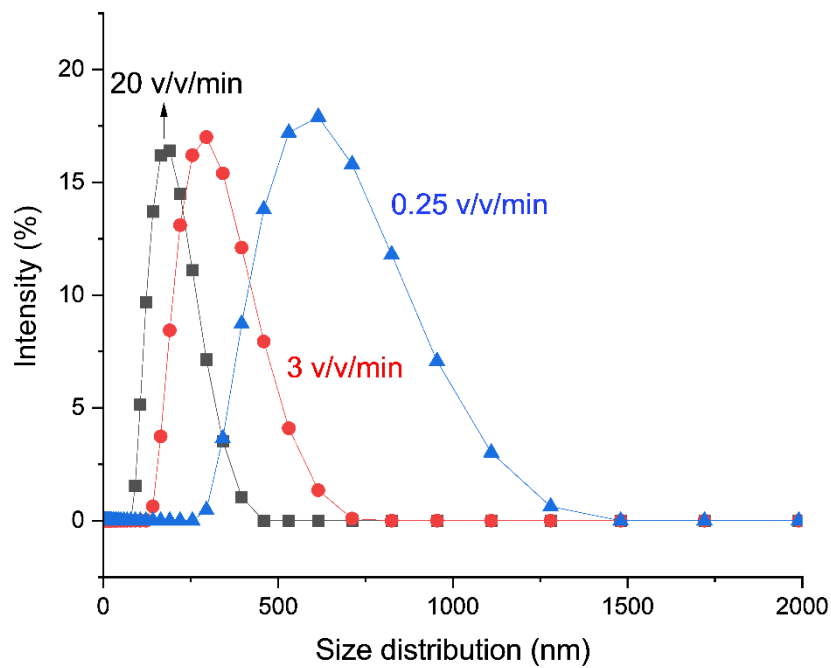

**Supplementary Figure 1.** DLS size distributions of LNP dispersion prepared at three different dilution rates by adding water to the lignin solution in a binary water-acetone solvent mixture.

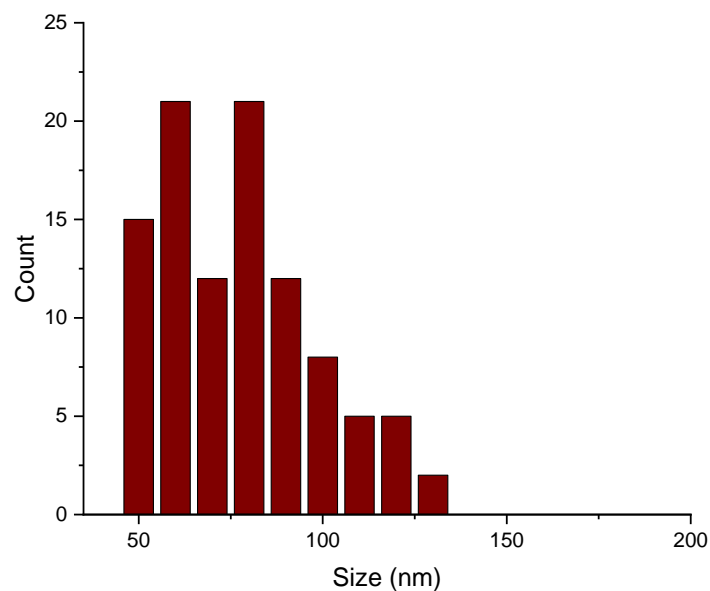

**Supplementary Figure 2.** Size distribution of LNPs measured from SEM image with PDI of 0.07.  $PDI = \left(\frac{\sigma}{D}\right)^2$  [1], where the average size  $D$  is 77 nm, and the standard deviation  $\sigma$  is 20 nm.

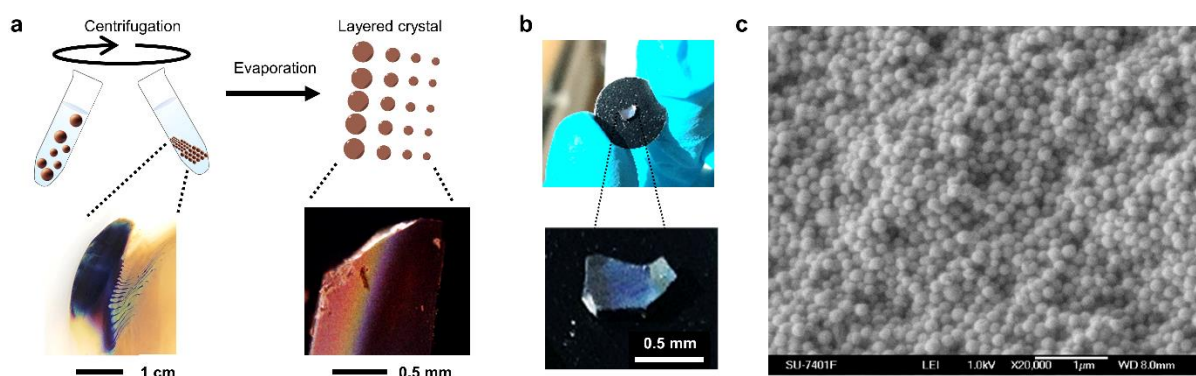

**Supplementary Figure 3.** (a) Scheme of forming photonic crystal from LNPs by centrifugation. Digital photo of the pellet after centrifugation (left) and digital microscope image of cross-section of LNPs photonic crystal (right). (b) Digital photograph of the photonic crystals. (c) SEM image of the cross-section of the photonic crystals.

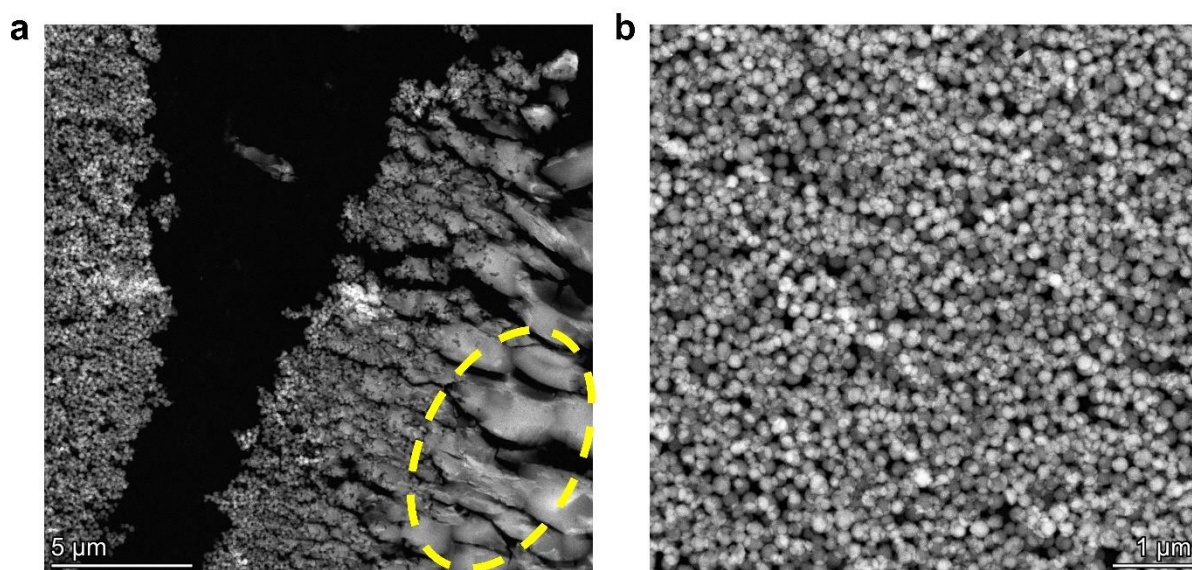

**Supplementary Figure 4.** (a) STEM image of sectioned LNPs photonic crystal. The region of resin was highlighted by a yellow circle. (b) STEM image of sectioned LNPs photonic crystal, which displays how the LNPs are arranged and packed inside the photonic crystal.

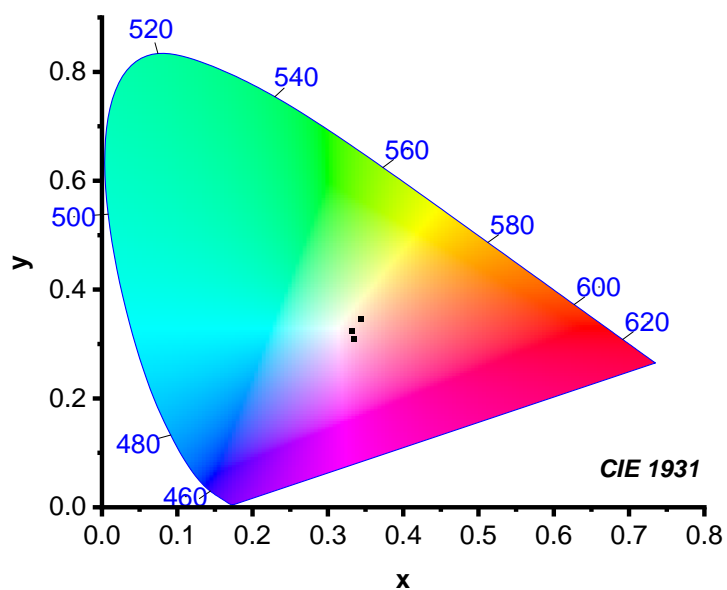

**Supplementary Figure 5.** CIE 1931 chromaticity coordinates of LNPs photonic crystal. Spectral power distribution of illuminant was D65.

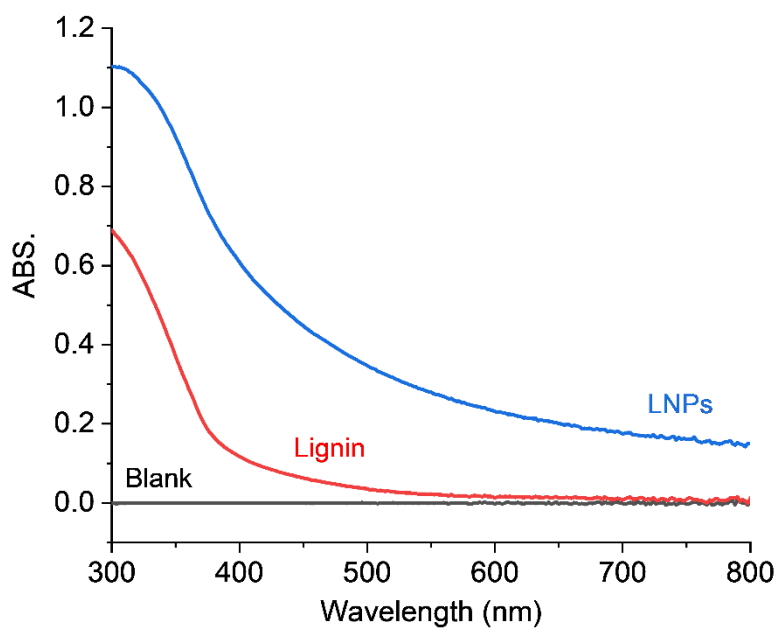

**Supplementary Figure 6.** Absorption spectra of lignin and LNPs. Lignin solution and LNPs dispersion were coated on a microscope cover glass. The spectrum of the cover glass was recorded as a background.

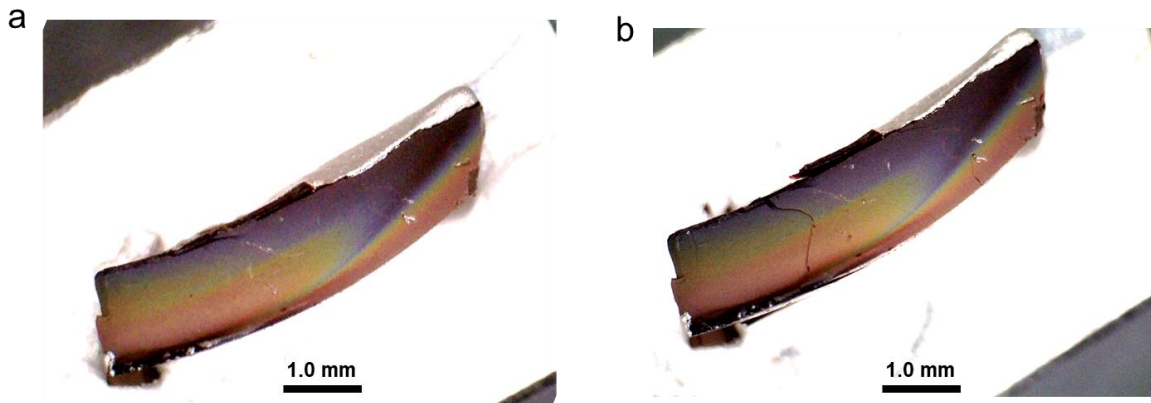

**Supplementary Figure 7.** Digital microscope images of LNP-PC (a) before and (b) after 120 s coating with gold.

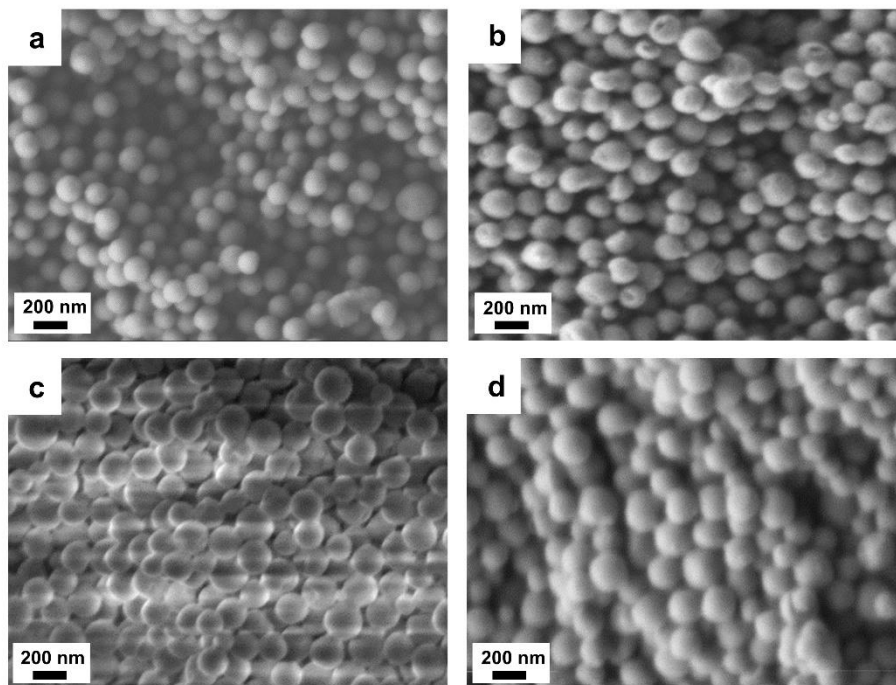

**Supplementary Figure 8.** SEM images of the fracture cross-section of LNPs in different color layers, (a) in blue, (b) in green, (c) in yellow, and (d) in orange.

## Supplementary References

- [1] N. Raval, R. Maheshwari, D. Kalyane, S.R. Youngren-Ortiz, M.B. Chougule, R.K. Tekade, Importance of physicochemical characterization of nanoparticles in pharmaceutical product development, Elsevier Inc., 2018.
