# Supplementary material for: Photonic crystals with rainbow colors by centrifugation-assisted assembly of colloidal lignin nanoparticles
Source: PubMed Central journal article supplement (PMC10227086; doi:10.1038/s41467-023-38819-5), 2023-05-29
Supplement: 41467_2023_38819_MOESM3_ESM.pdf [file 41467_2023_38819_MOESM3_ESM.pdf]

## **Description of Additional Supplementary Files**

File Name: Supplementary Movie 1

Description: Real-time recording of the evaporation-induced self-assembly of LNPs.
